# Supplementary material
Source: PubMed Central journal article supplement (PMC6704757)
Supplement: jama-322-642-s001.pdf [file jama-322-642-s001.pdf]

## Supplementary Online Content

Duncan MS, Freiberg MS, Greevy RA, Kundu S, Vasan RS, Tindle HA. Association of smoking cessation with subsequent risk of cardiovascular disease [published August 20, 2019]. *JAMA*. doi:10.1001/jama.2019.10298

**eTable 1.** Baseline Characteristics of Original Cohort by Smoking Status and Intensity

**eTable 2.** Baseline Characteristics of Offspring Cohort by Smoking Status and Intensity

**eTable 3.** CVD Event Types by Cohort

**eTable 4.** Adjusted Risk of Incident CVD in Heavy Former vs. Current Smokers – Additionally Adjusted for Cumulative Pack-Years

**eTable 5.** Comparison of Adjusted Risk of Incident CVD by Years Since Quitting: Polynomial Versus Linear Terms

**eTable 6.** Comparison of CVD Incidence Rates by Cohort and Influence of Age

**eTable 7.** Adjusted Risk of Incident CVD Among all Current and Former Smokers

**eTable 8.** Adjusted Risk of Incident CVD Among Heavy Ever and Never Smokers Using 6 Time Points

**eTable 9.** Adjusted Risk of Incident CVD Among Heavy Ever and Never Smokers Using 2 Time Points

**eFigure.** Cumulative Pack-Years Among Current and Former Smokers With  $\geq 20$  Pack-Years

**eAppendix.** Supplemental Methods

**eReferences**

This supplementary material has been provided by the authors to give readers additional information about their work.

## **Abbreviations**

BMI: body mass index

CI: confidence interval

CVD: cardiovascular disease

IRD: incidence rate difference

SD: standard deviation

SI: international system of units

**eTable 1. Baseline Characteristics of Original Cohort by Smoking Status and Intensity**

| Characteristic <sup>a</sup>           | Never Smokers<br>(Total N = 1631) |              | Former Smokers<br><20 Pack-Years<br>(Total N = 164) |              | Former Smokers<br>≥20 Pack-Years<br>(Total N = 104) |              | Current Smokers<br><20 Pack-Years<br>(Total N = 893) |              | Current Smokers<br>≥20 Pack-Years<br>(Total N = 1013) |              |
|---------------------------------------|-----------------------------------|--------------|-----------------------------------------------------|--------------|-----------------------------------------------------|--------------|------------------------------------------------------|--------------|-------------------------------------------------------|--------------|
|                                       | N                                 | Summary      | N                                                   | Summary      | N                                                   | Summary      | N                                                    | Summary      | N                                                     | Summary      |
| Age, years                            | 1631                              | 52.0 ± 8.6   | 164                                                 | 48.8 ± 8.5   | 104                                                 | 52.3 ± 8.2   | 893                                                  | 47.4 ± 8.0   | 1013                                                  | 49.3 ± 7.8   |
| Male Sex                              | 1631                              | 332 (20.4)   | 164                                                 | 65 (39.6)    | 104                                                 | 95 (91.4)    | 893                                                  | 256 (28.7)   | 1013                                                  | 780 (77.0)   |
| Education                             | 1610                              | --           | 163                                                 | --           | 97                                                  | --           | 886                                                  | --           | 1004                                                  | --           |
| <i>Less than High School Graduate</i> | --                                | 734 (45.6)   | --                                                  | 51 (31.3)    | --                                                  | 47 (48.5)    | --                                                   | 320 (36.1)   | --                                                    | 412 (41.0)   |
| <i>High School Graduate</i>           | --                                | 437 (27.1)   | --                                                  | 56 (34.4)    | --                                                  | 20 (20.6)    | --                                                   | 308 (34.8)   | --                                                    | 323 (32.2)   |
| <i>More than High School</i>          | --                                | 439 (27.3)   | --                                                  | 56 (34.4)    | --                                                  | 30 (30.9)    | --                                                   | 258 (29.1)   | --                                                    | 269 (26.8)   |
| Systolic Blood Pressure, mmHg         | 1631                              | 137.0 ± 24.6 | 164                                                 | 131.0 ± 20.4 | 104                                                 | 133.2 ± 19.2 | 893                                                  | 127.8 ± 21.0 | 1013                                                  | 130.9 ± 19.7 |
| Diastolic Blood Pressure, mmHg        | 1631                              | 84.9 ± 12.3  | 164                                                 | 82.3 ± 11.3  | 104                                                 | 84.6 ± 11.3  | 893                                                  | 80.5 ± 11.8  | 1013                                                  | 82.8 ± 11.4  |
| Antihypertensive Medication           | 1624                              | 76 (4.7)     | 164                                                 | 1 (0.6)      | 104                                                 | 4 (3.9)      | 892                                                  | 19 (2.1)     | 1013                                                  | 24 (2.4)     |
| Hypertension                          | 1629                              | 714 (43.8)   | 164                                                 | 57 (34.8)    | 104                                                 | 42 (40.4)    | 893                                                  | 244 (27.3)   | 1013                                                  | 345 (34.1)   |
| Body Mass Index, kg/m <sup>2</sup>    | 1626                              | 26.5 ± 4.3   | 163                                                 | 25.6 ± 3.9   | 104                                                 | 26.7 ± 4.0   | 892                                                  | 24.7 ± 4.0   | 1013                                                  | 25.2 ± 3.5   |
| Diabetes                              | 1615                              | 43 (2.7)     | 161                                                 | 2 (1.2)      | 104                                                 | 4 (3.9)      | 885                                                  | 11 (1.2)     | 1006                                                  | 15 (1.5)     |
| Total Cholesterol, mg/dL              | 1612                              | 241.9 ± 45.2 | 164                                                 | 240.5 ± 45.5 | 104                                                 | 233.5 ± 40.6 | 878                                                  | 234.3 ± 43.9 | 1006                                                  | 238.3 ± 42.3 |
| Current Drinkers                      | 1613                              | 822 (51.0)   | 159                                                 | 112 (70.4)   | 104                                                 | 86 (82.7)    | 886                                                  | 691 (78.0)   | 1002                                                  | 855 (85.3)   |
| Cigarettes per day                    | --                                | --           | --                                                  | --           | --                                                  | --           | 893                                                  | 12.5 ± 7.7   | 1013                                                  | 24.4 ± 9.4   |
| Cumulative Pack-Years                 | --                                | --           | 164                                                 | 6.1 ± 5.7    | 104                                                 | 38.9 ± 21.7  | 893                                                  | 9.9 ± 5.9    | 1013                                                  | 36.2 ± 15.2  |
| Years Since Quitting                  | --                                | --           | 164                                                 | 4.8 ± 6.0    | 104                                                 | 4.9 ± 4.3    | --                                                   | --           | --                                                    | --           |

SI conversion factors: To convert total cholesterol to mmol/L, multiply values by 0.0259.

a Summary statistics are displayed as Mean ± SD for continuous variables, and as N (%) for categorical variables.

**eTable 2. Baseline Characteristics of Offspring Cohort by Smoking Status and Intensity**

| Characteristic <sup>a</sup>           | Never Smokers<br>(Total N = 1831) |              | Former Smokers<br><20 Pack-Years<br>(Total N = 623) |              | Former Smokers<br>≥20 Pack-Years<br>(Total N = 302) |              | Current Smokers<br><20 Pack-Years<br>(Total N = 1257) |              | Current Smokers<br>≥20 Pack-Years<br>(Total N = 952) |              |
|---------------------------------------|-----------------------------------|--------------|-----------------------------------------------------|--------------|-----------------------------------------------------|--------------|-------------------------------------------------------|--------------|------------------------------------------------------|--------------|
|                                       | N                                 | Summary      | N                                                   | Summary      | N                                                   | Summary      | N                                                     | Summary      | N                                                    | Summary      |
| Age, years                            | 1831                              | 34.7 ± 11.2  | 623                                                 | 36.4 ± 8.5   | 302                                                 | 45.6 ± 7.4   | 1257                                                  | 31.0 ± 8.4   | 952                                                  | 42.4 ± 7.6   |
| Male Sex                              | 1831                              | 760 (41.5)   | 623                                                 | 309 (49.6)   | 302                                                 | 239 (79.1)   | 1257                                                  | 513 (40.8)   | 952                                                  | 557 (58.5)   |
| Education                             | 1435                              | --           | 490                                                 | --           | 241                                                 | --           | 917                                                   | --           | 680                                                  | --           |
| <i>Less than High School Graduate</i> | --                                | 64 (4.5)     | --                                                  | 26 (5.3)     | --                                                  | 43 (17.8)    | --                                                    | 51 (5.6)     | --                                                   | 119 (17.5)   |
| <i>High School Graduate</i>           | --                                | 449 (31.3)   | --                                                  | 146 (29.8)   | --                                                  | 89 (36.9)    | --                                                    | 334 (36.4)   | --                                                   | 273 (40.2)   |
| <i>More than High School</i>          | --                                | 922 (64.3)   | --                                                  | 318 (64.9)   | --                                                  | 109 (45.2)   | --                                                    | 532 (58.0)   | --                                                   | 288 (42.4)   |
| Systolic Blood Pressure, mmHg         | 1831                              | 121.5 ± 16.1 | 623                                                 | 121.9 ± 15.1 | 302                                                 | 131.5 ± 19.5 | 1256                                                  | 117.5 ± 13.9 | 952                                                  | 125.2 ± 17.9 |
| Diastolic Blood Pressure, mmHg        | 1831                              | 78.5 ± 10.6  | 623                                                 | 79.2 ± 10.4  | 302                                                 | 84.6 ± 11.7  | 1256                                                  | 75.2 ± 9.9   | 952                                                  | 80.6 ± 11.4  |
| Antihypertensive Medication           | 1829                              | 55 (3.0)     | 623                                                 | 15 (2.4)     | 300                                                 | 28 (9.3)     | 1255                                                  | 15 (1.2)     | 947                                                  | 39 (4.1)     |
| Hypertension                          | 1830                              | 339 (18.5)   | 623                                                 | 122 (19.6)   | 302                                                 | 122 (40.4)   | 1255                                                  | 127 (10.1)   | 948                                                  | 238 (25.1)   |
| Body Mass Index, kg/m <sup>2</sup>    | 1829                              | 25.0 ± 4.5   | 623                                                 | 25.0 ± 4.2   | 302                                                 | 27.1 ± 3.8   | 1256                                                  | 24.3 ± 4.3   | 951                                                  | 25.8 ± 4.1   |
| Diabetes                              | 1793                              | 24 (1.3)     | 612                                                 | 7 (1.1)      | 295                                                 | 14 (4.8)     | 1240                                                  | 12 (1.0)     | 934                                                  | 31 (3.3)     |
| Total Cholesterol, mg/dL              | 1817                              | 193.6 ± 38.5 | 621                                                 | 199.2 ± 38.1 | 302                                                 | 218.7 ± 43.1 | 1247                                                  | 190.4 ± 39.0 | 948                                                  | 214.4 ± 40.3 |
| Current Drinkers                      | 1818                              | 1415 (77.8)  | 617                                                 | 558 (90.4)   | 301                                                 | 267 (88.7)   | 1240                                                  | 1095 (88.3)  | 944                                                  | 843 (89.3)   |
| Cigarettes per day                    | --                                | --           | --                                                  | --           | --                                                  | --           | 1257                                                  | 15.0 ± 8.6   | 952                                                  | 30.2 ± 10.8  |
| Cumulative Pack-Years                 | --                                | --           | 623                                                 | 7.9 ± 5.4    | 302                                                 | 39.0 ± 20.3  | 1257                                                  | 8.4 ± 5.6    | 952                                                  | 36.5 ± 16.3  |
| Years Since Quitting                  | --                                | --           | 623                                                 | 8.4 ± 6.5    | 303                                                 | 6.4 ± 4.6    | --                                                    | --           | --                                                   | --           |

SI conversion factors: To convert total cholesterol to mmol/L, multiply values by 0.0259.

a Summary statistics are displayed as Mean ± SD for continuous variables, and as N (%) for categorical variables.

**eTable 3. CVD Event Types by Cohort**

| <b>Event Type</b>     | <b>Original Cohort</b> | <b>Offspring Cohort</b> | <b>Total</b>        |
|-----------------------|------------------------|-------------------------|---------------------|
| Myocardial Infarction | 502                    | 335                     | 837                 |
| Cerebrovascular Event | 450                    | 222                     | 672                 |
| CVD Death             | 254                    | 60                      | 314                 |
| Heart Failure         | 406                    | 206                     | 612                 |
| <i>Total</i>          | <i>1,612</i>           | <i>823</i>              | <b><i>2,435</i></b> |

**eTable 4. Adjusted Risk of Incident CVD in Heavy Former vs. Current Smokers – Additionally Adjusted for Cumulative Pack-Years<sup>a</sup>**

| Years Since Quitting Category  | Person-Exams | Incident CVDs | Person-Years (PY) | Incidence Rate per 1000 PY [95% CI] | Hazard Ratio [95% CI] | p-value |
|--------------------------------|--------------|---------------|-------------------|-------------------------------------|-----------------------|---------|
| <b><i>Pooled Cohort</i></b>    |              |               |                   |                                     |                       |         |
| Current Smokers                | 13,885       | 558           | 41,725            | 11.28 [10.00, 12.74]                | 1.00                  | --      |
| <5 years                       | 2586         | 101           | 7851              | 6.81 [5.49, 8.45]                   | 0.62 [0.50, 0.77]     | <0.001  |
| [5, 10) years                  | 2088         | 99            | 6342              | 6.95 [5.58, 8.66]                   | 0.63 [0.50, 0.79]     | <0.001  |
| [10, 15) years                 | 1429         | 76            | 4455              | 6.28 [4.90, 8.06]                   | 0.57 [0.44, 0.74]     | <0.001  |
| [15, 25) years                 | 2123         | 145           | 6741              | 6.15 [5.05, 7.50]                   | 0.59 [0.47, 0.73]     | <0.001  |
| 25+ years                      | 1326         | 116           | 4187              | 5.16 [4.10, 6.49]                   | 0.50 [0.38, 0.66]     | <0.001  |
| <b><i>Original Cohort</i></b>  |              |               |                   |                                     |                       |         |
| Current Smokers                | 9727         | 363           | 20,450            | 12.89 [11.01, 15.08]                | 1.00                  | --      |
| <5 years                       | 1711         | 70            | 3613              | 8.53 [6.55, 11.12]                  | 0.68 [0.52, 0.89]     | 0.005   |
| [5, 10) years                  | 1268         | 63            | 2623              | 8.32 [6.30, 11.00]                  | 0.67 [0.50, 0.89]     | 0.007   |
| [10, 15) years                 | 850          | 44            | 1757              | 7.41 [5.35, 10.28]                  | 0.60 [0.43, 0.86]     | 0.004   |
| [15, 25) years                 | 1128         | 63            | 2361              | 5.65 [4.24, 7.54]                   | 0.51 [0.37, 0.70]     | <0.001  |
| 25+ years                      | 670          | 62            | 1378              | 5.99 [4.39, 8.17]                   | 0.53 [0.36, 0.79]     | 0.002   |
| <b><i>Offspring Cohort</i></b> |              |               |                   |                                     |                       |         |
| Current Smokers                | 4158         | 195           | 21,275            | 7.51 [6.06, 9.32]                   | 1.00                  | --      |
| <5 years                       | 875          | 31            | 4239              | 3.79 [2.56, 5.60]                   | 0.52 [0.35, 0.76]     | <0.001  |
| [5, 10) years                  | 820          | 36            | 3720              | 4.24 [2.94, 6.13]                   | 0.60 [0.42, 0.85]     | 0.005   |
| [10, 15) years                 | 579          | 32            | 2698              | 3.85 [2.60, 5.70]                   | 0.53 [0.35, 0.79]     | 0.002   |
| [15, 25) years                 | 995          | 82            | 4379              | 4.74 [3.54, 6.35]                   | 0.67 [0.49, 0.92]     | 0.013   |
| 25+ years                      | 656          | 54            | 2809              | 3.11 [2.17, 4.45]                   | 0.47 [0.31, 0.70]     | <0.001  |

<sup>a</sup> This analysis is limited to current and former smokers with at least 20 cumulative pack-years. Incidence rates and hazard ratios are adjusted for age, sex, education, examination decade, systolic blood pressure, antihypertensive medication, diabetes status, body mass index, total cholesterol, and alcohol consumption. Dynamic variables are time-updated.

**eTable 5. Comparison of Adjusted Risk of Incident CVD by Years Since Quitting: Polynomial Versus Linear Terms<sup>a</sup>**

| Years Since Quitting Category                    | Model with Polynomials |         | Model with Linear Terms |         |
|--------------------------------------------------|------------------------|---------|-------------------------|---------|
|                                                  | Hazard Ratio [95% CI]  | p-value | Hazard Ratio [95% CI]   | p-value |
| <b><i>Pooled Cohort – Former vs. Current</i></b> |                        |         |                         |         |
| Current Smokers                                  | 1.00                   | ---     | 1.00                    | ---     |
| <5 years                                         | 0.61 [0.49, 0.76]      | <0.001  | 0.60 [0.49, 0.75]       | <0.001  |
| [5, 10) years                                    | 0.61 [0.49, 0.77]      | <0.001  | 0.62 [0.49, 0.77]       | <0.001  |
| [10, 15) years                                   | 0.54 [0.42, 0.70]      | <0.001  | 0.55 [0.43, 0.71]       | <0.001  |
| [15, 25) years                                   | 0.55 [0.45, 0.68]      | <0.001  | 0.55 [0.45, 0.68]       | <0.001  |
| 25+ years                                        | 0.45 [0.35, 0.58]      | <0.001  | 0.45 [0.35, 0.58]       | <0.001  |
| <b><i>Pooled Cohort – Former vs. Never</i></b>   |                        |         |                         |         |
| <5 years                                         | 1.40 [1.12, 1.73]      | 0.002   | 1.38 [1.11, 1.71]       | 0.003   |
| [5, 10) years                                    | 1.42 [1.15, 1.77]      | 0.001   | 1.43 [1.15, 1.77]       | 0.001   |
| [10, 15) years                                   | 1.25 [0.98, 1.60]      | 0.08    | 1.26 [0.98, 1.61]       | 0.07    |
| [15, 25) years                                   | 1.22 [1.00, 1.47]      | 0.045   | 1.23 [1.02, 1.48]       | 0.033   |
| 25+ years                                        | 0.98 [0.78, 1.22]      | 0.85    | 0.98 [0.78, 1.23]       | 0.85    |
| Never Smokers                                    | 1.00                   | ---     | 1.00                    | ---     |

<sup>a</sup> Models are limited to never and heavy ( $\geq 20$  pack-years) ever smokers. Hazard Ratios are adjusted for age, sex, education, examination decade, hypertension, diabetes status, body mass index, total cholesterol, and alcohol consumption. Dynamic variables are time-updated.

**eTable 6. Comparison of CVD Incidence Rates by Cohort and Influence of Age<sup>a</sup>**

| Years Since Quitting Category | Adjusted Incidence Rate [95% CI] <sup>b</sup> |                                               |                      |
|-------------------------------|-----------------------------------------------|-----------------------------------------------|----------------------|
|                               | Offspring Cohort                              | Offspring Cohort: Participants Aged $\geq 50$ | Original Cohort      |
| Current Smoker                | 7.71 [6.27, 9.48]                             | 11.50 [8.94, 14.78]                           | 13.04 [11.21, 15.18] |
| <5 years                      | 3.83 [2.59, 5.65]                             | 6.49 [4.26, 9.88]                             | 8.62 [6.63, 11.20]   |
| [5, 10) years                 | 4.29 [2.97, 6.18]                             | 7.49 [5.12, 10.96]                            | 8.39 [6.35, 11.07]   |
| [10, 15) years                | 3.86 [2.61, 5.72]                             | 6.19 [4.11, 9.32]                             | 7.45 [5.37, 10.32]   |
| [15, 25) years                | 4.70 [3.52, 6.29]                             | 8.01 [6.01, 10.66]                            | 5.65 [4.24, 7.53]    |
| 25+ years                     | 3.00 [2.10, 4.28]                             | 5.14 [3.62, 7.31]                             | 5.97 [4.39, 8.11]    |
| Never Smoker                  | 2.57 [2.07, 3.20]                             | 4.35 [3.46, 5.46]                             | 6.72 [5.77, 7.82]    |

a Results are limited to never smokers and heavy ever smokers ( $\geq 20$  pack years) since they are the focus of our primary analyses.

b Incidence rates are adjusted for age, sex, education, examination decade, systolic blood pressure, diabetes status, body mass index, total cholesterol, and alcohol consumption. Incidence rates were estimated from a Poisson regression model with an offset equal to the natural logarithm of follow-up time.



**eTable 7. Adjusted Risk of Incident CVD Among All Current and Former Smokers<sup>a</sup>**

| Years Since Quitting Category                    | Person-Exams | Incident CVDs | Person-Years (PY) | Incidence Rate per 1000 PY [95% CI] | Hazard Ratio [95% CI] | p-value |
|--------------------------------------------------|--------------|---------------|-------------------|-------------------------------------|-----------------------|---------|
| <b><i>Pooled Cohort – Former vs. Current</i></b> |              |               |                   |                                     |                       |         |
| Current Smokers                                  | 21,111       | 666           | 67,478            | 9.81 [8.83, 10.90]                  | 1.00                  | ---     |
| <5 years                                         | 4743         | 138           | 15,004            | 5.89 [4.90, 7.09]                   | 0.60 [0.50, 0.72]     | <0.001  |
| [5, 10) years                                    | 3947         | 132           | 12,765            | 5.62 [4.65, 6.79]                   | 0.56 [0.46, 0.68]     | <0.001  |
| [10, 15) years                                   | 2916         | 106           | 9611              | 4.99 [4.04, 6.16]                   | 0.49 [0.40, 0.61]     | <0.001  |
| [15, 25) years                                   | 4857         | 238           | 16,625            | 5.28 [4.50, 6.20]                   | 0.53 [0.45, 0.63]     | <0.001  |
| 25+ years                                        | 4191         | 260           | 14,916            | 4.64 [3.92, 5.49]                   | 0.45 [0.37, 0.54]     | <0.001  |
| <b><i>Pooled Cohort – Former vs. Never</i></b>   |              |               |                   |                                     |                       |         |
| <5 years                                         | 4743         | 138           | 15,004            | 5.89 [4.90, 7.09]                   | 1.27 [1.06, 1.53]     | 0.01    |
| [5, 10) years                                    | 3947         | 132           | 12,765            | 5.62 [4.65, 6.79]                   | 1.23 [1.02, 1.48]     | 0.03    |
| [10, 15) years                                   | 2916         | 106           | 9610              | 4.99 [4.04, 6.16]                   | 1.08 [0.88, 1.33]     | 0.48    |
| [15, 25) years                                   | 4857         | 238           | 16,625            | 5.28 [4.50, 6.20]                   | 1.15 [0.99, 1.34]     | 0.07    |
| 25+ years                                        | 4191         | 260           | 14,916            | 4.64 [3.92, 5.49]                   | 0.98 [0.84, 1.15]     | 0.83    |
| Never Smokers                                    | 29,089       | 895           | 91,227            | 4.72 [4.22, 5.28]                   | 1.00                  | ---     |

<sup>a</sup> Incidence rates and hazard ratios are adjusted for age, sex, education, examination decade, hypertension, diabetes status, body mass index, total cholesterol, and alcohol consumption. Dynamic variables are time-updated.

**eTable 8. Adjusted Risk of Incident CVD Among Heavy Ever and Never Smokers Using 6 Time Points<sup>a</sup>**

| Years Since Quitting Category             | Person-Exams | Incident CVDs | Person-Years (PY) | Incidence Rate per 1000 PY [95% CI] | Hazard Ratio [95% CI] <sup>b</sup> | p-value |
|-------------------------------------------|--------------|---------------|-------------------|-------------------------------------|------------------------------------|---------|
| <i>Pooled Cohort – Former vs. Current</i> |              |               |                   |                                     |                                    |         |
| Current Smokers                           | 6917         | 778           | 53,222            | 8.79 [8.00, 9.66]                   | 1.00                               | ---     |
| <5 years                                  | 1303         | 134           | 9815              | 4.96 [4.21, 5.85]                   | 0.62 [0.51, 0.75]                  | <0.001  |
| [5, 10) years                             | 839          | 116           | 6616              | 5.14 [4.32, 6.11]                   | 0.64 [0.52, 0.78]                  | <0.001  |
| [10, 15) years                            | 641          | 78            | 4878              | 5.21 [4.28, 6.34]                   | 0.58 [0.45, 0.74]                  | <0.001  |
| [15, 25) years                            | 1065         | 180           | 7307              | 5.52 [4.81, 6.34]                   | 0.63 [0.52, 0.75]                  | <0.001  |
| 25+ years                                 | 587          | 97            | 3694              | 4.18 [3.56, 4.90]                   | 0.51 [0.39, 0.66]                  | <0.001  |
| <i>Pooled Cohort – Former vs. Never</i>   |              |               |                   |                                     |                                    |         |
| <5 years                                  | 1303         | 134           | 9815              | 4.96 [4.21, 5.85]                   | 1.24 [1.03, 1.51]                  | 0.027   |
| [5, 10) years                             | 839          | 116           | 6616              | 5.14 [4.32, 6.11]                   | 1.24 [1.01, 1.52]                  | 0.035   |
| [10, 15) years                            | 641          | 78            | 4878              | 5.21 [4.28, 6.34]                   | 1.12 [0.86, 1.45]                  | 0.40    |
| [15, 25) years                            | 1065         | 180           | 7307              | 5.52 [4.81, 6.34]                   | 1.24 [1.04, 1.48]                  | 0.014   |
| 25+ years                                 | 587          | 97            | 3694              | 4.18 [3.56, 4.90]                   | 1.04 [0.82, 1.33]                  | 0.73    |
| Never Smokers                             | 14,188       | 1180          | 110,709           | 4.69 [4.26, 5.16]                   | 1.00                               | ---     |

a This analysis is limited to never smokers and ever smokers with at least 20 cumulative pack-years.

b Incidence rates and hazard ratios are adjusted for age, sex, education, examination decade, systolic blood pressure, antihypertensive medication use, diabetes status, body mass index, total cholesterol, and alcohol consumption. Dynamic variables are time-updated.

**eTable 9. Adjusted Risk of Incident CVD Among Heavy Ever and Never Smokers Using 2 Time Points<sup>a</sup>**

| Years Since Quitting Category                    | Person-Exams | Incident CVDs | Person-Years (PY) | Incidence Rate per 1000 PY [95% CI] | Hazard Ratio [95% CI] <sup>b</sup> | p-value |
|--------------------------------------------------|--------------|---------------|-------------------|-------------------------------------|------------------------------------|---------|
| <b><i>Pooled Cohort – Former vs. Current</i></b> |              |               |                   |                                     |                                    |         |
| Current Smokers                                  | 3416         | 895           | 56,012            | 8.04 [6.80, 9.49]                   | 1.00                               | ---     |
| <5 years                                         | 198          | 30            | 2695              | 4.26 [2.62, 6.92]                   | 0.68 [0.41, 1.13]                  | 0.14    |
| [5, 10) years                                    | 608          | 226           | 11,389            | 5.54 [3.71, 8.27]                   | 0.63 [0.51, 0.77]                  | <0.001  |
| [10, 15) years                                   | 128          | 40            | 2253              | 5.19 [3.28, 8.20]                   | 0.51 [0.35, 0.76]                  | <0.001  |
| [15, 25) years                                   | 203          | 66            | 3859              | 4.66 [3.43, 6.34]                   | 0.58 [0.43, 0.80]                  | <0.001  |
| 25+ years                                        | 33           | 9             | 519               | 4.06 [2.77, 5.95]                   | 0.38 [0.16, 0.91]                  | 0.030   |
| <b><i>Pooled Cohort – Former vs. Never</i></b>   |              |               |                   |                                     |                                    |         |
| <5 years                                         | 198          | 30            | 2695              | 4.26 [2.62, 6.92]                   | 1.63 [1.01, 2.63]                  | 0.044   |
| [5, 10) years                                    | 608          | 226           | 11,389            | 5.54 [3.71, 8.27]                   | 1.21 [0.92, 1.59]                  | 0.18    |
| [10, 15) years                                   | 128          | 40            | 2253              | 5.19 [3.28, 8.20]                   | 0.99 [0.62, 1.57]                  | 0.96    |
| [15, 25) years                                   | 203          | 66            | 3859              | 4.66 [3.43, 6.34]                   | 1.13 [0.76, 1.67]                  | 0.55    |
| 25+ years                                        | 33           | 9             | 519               | 4.06 [2.77, 5.95]                   | 0.64 [0.26, 1.60]                  | 0.34    |
| Never Smokers                                    | 6072         | 1211          | 113,144           | 4.87 [3.26, 7.26]                   | 1.00                               | ---     |

a This analysis is limited to never smokers and ever smokers with at least 20 cumulative pack-years.

b Incidence rates and hazard ratios are adjusted for age, sex, education, examination decade, systolic blood pressure, antihypertensive medication use, diabetes status, body mass index, total cholesterol, and alcohol consumption. Dynamic variables are time-updated.

**eFigure. Cumulative Pack-Years Among Current and Former Smokers With  $\geq 20$  Pack-Years**

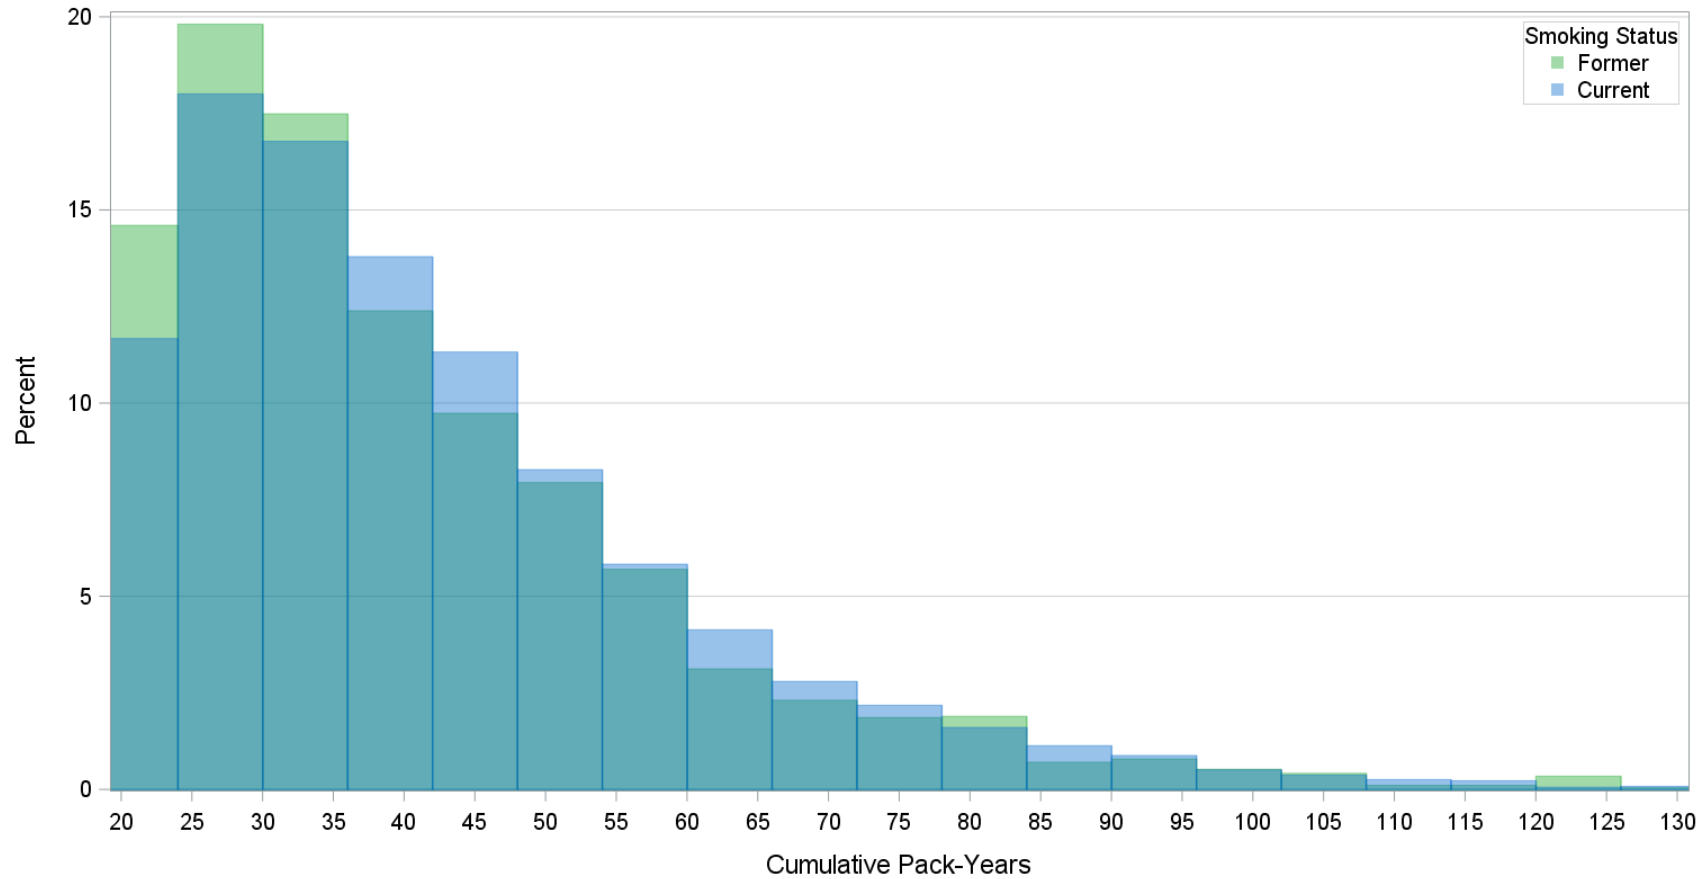

Overlaid histogram is limited to heavy ever smokers with at least 20 cumulative pack-years. The plot displays the distribution of cumulative pack-years among former smokers in green and among current smokers in blue. The intermediate color (which takes up the majority of the plot) displays the overlap in distribution of cumulative pack-years between these two groups of ever smokers.

## eAppendix. Supplemental Methods

### *Covariate Definitions*

This investigation included age, sex, education, decade of examination to account for temporal trends, hypertension status, diabetes mellitus, body mass index (BMI), total cholesterol, and alcohol consumption as covariates. Education was included as a categorical variable based on self-reported highest level of education completed; categories included: less than high school education, high school graduate or equivalent, or education beyond high school, with high school education or equivalent serving as the referent group. Systolic blood pressure was averaged based on two physician's readings. Receipt of an antihypertensive medication was self-reported. Participants were classified as having diabetes mellitus on the basis of any of the following: fasting blood glucose >126 mg/dL; non-fasting blood glucose > 200 mg/dL; or receipt of medication for the treatment of diabetes mellitus. At each examination, participants' weight was measured in kilograms and height in centimeters. From these values, BMI was calculated. Total cholesterol was directly measured using standardized assays.<sup>1</sup> Blood was drawn from participants at each examination cycle following an overnight fast of at least 10 hours. Biosamples were stored at -20 (pre-1990 exams) to -80 C (post-1990 exams) until they were assayed. Alcohol consumption was based on self-reported consumption of at least one alcoholic beverage per month and from their responses, participants were classified as current, former, or never drinkers.

### *Incidence Rate Estimation*

To estimate adjusted incidence rates, we used a Poisson regression model with an offset term equal to the natural-logarithm of follow-up time. Estimates were generated for the "average" characteristics among participants in each cohort. For continuous variables, the median value was used. For categorical variables, dummy variables were created and the proportion of individuals falling into each category (except the referent) was used to estimate incidence rates (similar to the calculation of least square means in linear regression). Since each row in our dataset corresponded to a single person-exam, we were able to account for changing covariate values over time, making these incidence rates "time-updated."

### *Incidence Rate Difference*

The primary models for statistical inference are the proportional hazards regression models. The Poisson regression models are used to provide descriptive statistics on an absolute scale. To maintain consistency with the primary analysis model, approximate adjusted incident rate differences (IRD) were anchored on the base rate for the reference group estimated by the Poisson regression and calculated using the respective hazard ratio from the primary analysis model, i.e. base rate  $\times$  (hazard ratio - 1). The 95% confidence bounds were derived from the bounds for the hazard ratio. These may be interpreted as an estimate of the incident rate difference that would be observed in a cohort consisting of patients with "average" characteristics, which were used in the calculation of the base rate.

### *Choice of Polynomial Terms on Continuous Variables*

Many of the continuous covariates in our models may not have a linear association with CVD risk and we sought to incorporate such non-linearity. We started with second-order polynomials on all continuous covariates and added up to 4th order terms so long as the higher order terms were statistically significant. We performed a sensitivity analysis with all covariates as linear and observed very similar results (eTable 5).

## eReference

1. Cobain MR, Pencina MJ, D'Agostino RB, Vasan RS. Lifetime risk for developing dyslipidemia: the Framingham Offspring Study. *Am J Med.* 2007;120(7):623-630.
